# Supplementary material
Source: Springer Nature journal article supplement (https://www.springermedizin.de/resource/supplementary/12913_2007_577_MOESM1_ESM.pdf/9535904)

**Time line**  
October 2005

**Measurements**

Recruitment:  
25 practices

Randomisation

**Intervention**  
**13 practices**

**Usual Care**  
**12 practices**

Extensive training

Short training

January 2006

Inclusion of 360 patients

Inclusion of 360 patients

T0

- Questionnaire  
- CVD risk  
registered by  
nurse

Intervention

Usual care

T1

- Questionnaire  
and pedometer  
sent to home  
address

T2

- Questionnaire  
sent to home  
address  
- CVD risk  
extracted from  
medical file  
by nurse

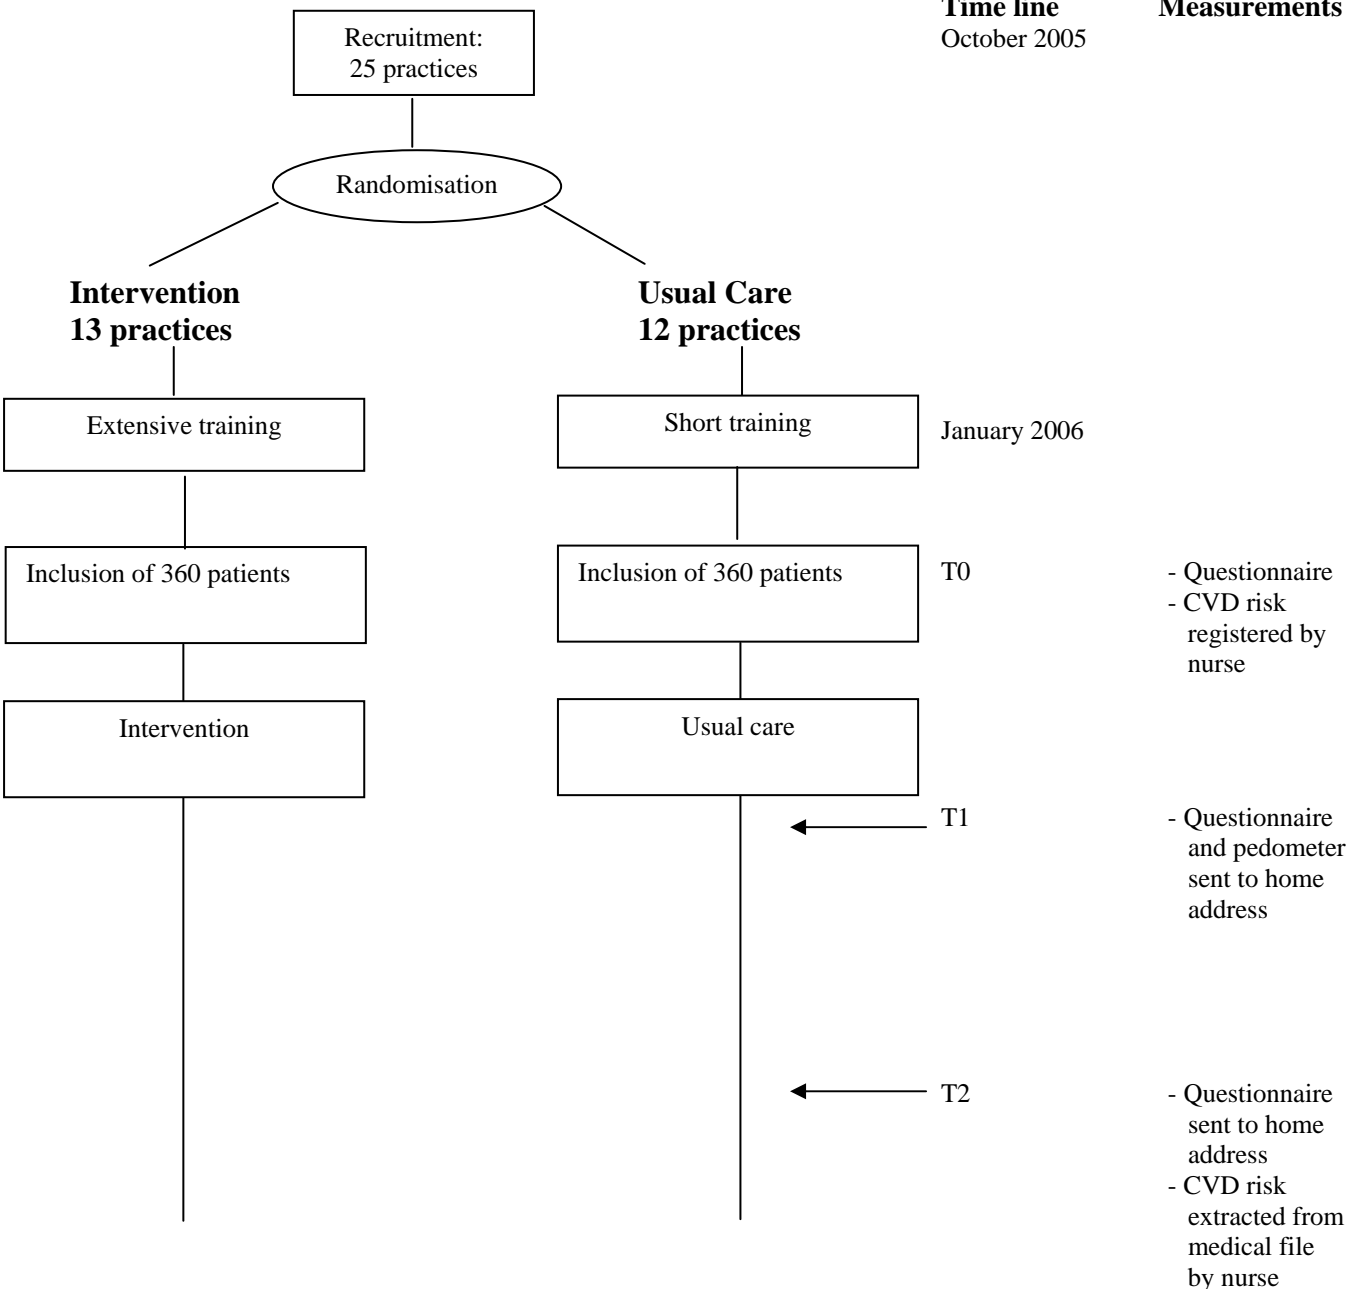

Supplement: MOESM1 [file 9535904]
